# Supplementary material for: Antioxidant Effect of a Dietary Supplement Containing Fermentative S-Acetyl-Glutathione and Silybin in Dogs with Liver Disease
Source: MDPI journal article supplement (doi:10.3390/vetsci10020131), 2023-02-08
Supplement: s1 [file vetsci-2132004-supplementary.pdf › vetsci-2132004-supplementary.pdf]

**Supplementary file.**

Table S1. Biochemical parameters of both groups (control -CTR and treated -TRT group) at the baseline (T0). Total proteins (TP), albumins (ALB), glucose (GLU), alanine transaminases (ALT) alanine aminotransferases (AST), alkaline phosphatases (ALP), Gamma-glutamyl transferase (GGT), bilirubin (BIL), triglycerides (TRI), c- reactive protein (PCR). Minimum and maximum values of the tested parameters are indicated in parenthesis.

| Dog | Group | BIL<br>(0-0,7 mg/dL) | ALT<br>(0-40 UI/L) | AST<br>(0-40 UI/L) | GGT<br>(2-8 UI/L) | TP<br>(5,4-7,5 g/dL) | ALB<br>(2,3-3,9 g/dL) | GLU<br>(67-132 mg/dL) | PCR<br>(0-1,5 mg/L) | TRI<br>(23-110 mg/dl) | ALP<br>(20-150 UI/L) |
|-----|-------|----------------------|--------------------|--------------------|-------------------|----------------------|-----------------------|-----------------------|---------------------|-----------------------|----------------------|
| D1  | TRT   | 2,79                 | 120                | 219,95             | 34,23             | 6,5                  | 3,7                   | 123,1                 | 1                   | 55,7                  | 156,33               |
| D2  | TRT   | 2,96                 | 131,48             | 225,32             | 13,8              | 8,2                  | 3,2                   | 70,7                  | 1,1                 | 116,8                 | 356,08               |
| D3  | TRT   | 1,23                 | 293,46             | 348,13             | 33,22             | 6,4                  | 2,8                   | 80,1                  | 0,6                 | 156                   | 165,25               |
| D4  | TRT   | 1,71                 | 384,43             | 306,54             | 32                | 7,9                  | 3,7                   | 114,7                 | 0,6                 | 129,2                 | 391,27               |
| D5  | TRT   | 3,75                 | 217,5              | 205,84             | 38,16             | 7,2                  | 2,8                   | 71                    | 0,2                 | 112,4                 | 230,37               |
| D6  | TRT   | 3,6                  | 252,91             | 240,87             | 14,66             | 6,9                  | 3                     | 108                   | 1,2                 | 120,3                 | 150,63               |
| D7  | TRT   | 3,41                 | 501,4              | 439,55             | 22,73             | 7,5                  | 2,8                   | 129,5                 | 0,8                 | 167,1                 | 331,14               |
| D8  | TRT   | 2,27                 | 560,02             | 331,47             | 21,61             | 5,7                  | 3,3                   | 123                   | 1,5                 | 130,6                 | 159,27               |
| D9  | TRT   | 1,38                 | 418,02             | 364,79             | 34,39             | 6,7                  | 2,3                   | 86                    | 0,3                 | 199,3                 | 392,08               |
| D10 | TRT   | 1,23                 | 331,54             | 357,51             | 25,19             | 5,4                  | 2,6                   | 121,2                 | 1,4                 | 150,4                 | 279,69               |
| D11 | TRT   | 0,81                 | 311,03             | 177,62             | 30,95             | 7,4                  | 3                     | 84,7                  | 1,4                 | 161,2                 | 231,63               |
| D12 | TRT   | 2,13                 | 438,31             | 408,25             | 13,25             | 6,5                  | 3,4                   | 128,8                 | 1,5                 | 97,8                  | 344,25               |
| D13 | CTR   | 3,45                 | 117,84             | 139,42             | 8,76              | 6                    | 2,6                   | 108,1                 | 1,3                 | 170,7                 | 197,45               |
| D14 | CTR   | 1,51                 | 492,84             | 482,86             | 9,16              | 6,3                  | 3,8                   | 71,9                  | 1,5                 | 57                    | 198,45               |
| D15 | CTR   | 2,52                 | 526,23             | 399,08             | 22,53             | 7,2                  | 3                     | 77,9                  | 1,4                 | 6,1                   | 199,45               |
| D16 | CTR   | 3,23                 | 337,38             | 385,94             | 23,66             | 6,8                  | 3,6                   | 67,9                  | 1                   | 75,7                  | 200,45               |
| D17 | CTR   | 3,8                  | 253,85             | 392,96             | 7,44              | 5,9                  | 2,8                   | 129,8                 | 1,2                 | 219,2                 | 201,45               |
| D18 | CTR   | 3,07                 | 161,69             | 483,09             | 21,06             | 6,1                  | 3,9                   | 75,1                  | 1,1                 | 186,2                 | 202,45               |

|     |     |      |        |        |       |     |     |       |     |       |        |
|-----|-----|------|--------|--------|-------|-----|-----|-------|-----|-------|--------|
| D19 | CTR | 2,35 | 428,63 | 434,6  | 32,4  | 5,3 | 3,7 | 107,5 | 1,5 | 159,8 | 203,45 |
| D20 | CTR | 3,51 | 295,49 | 359,54 | 39,01 | 7,5 | 2,6 | 83,6  | 1,5 | 130,7 | 204,45 |
| D21 | CTR | 0,78 | 198,49 | 85,17  | 33,89 | 5,7 | 3,9 | 110,1 | 0,8 | 83,5  | 205,45 |
| D22 | CTR | 1,57 | 173,16 | 132,78 | 13,28 | 6,2 | 2,6 | 128,9 | 0,8 | 92,5  | 206,45 |
| D23 | CTR | 2,81 | 378,71 | 136,56 | 10,41 | 6,8 | 3   | 89,3  | 1,3 | 190   | 207,45 |
| D24 | CTR | 3,54 | 268,73 | 112,34 | 9,08  | 6,3 | 3,2 | 96,7  | 0,7 | 163,8 | 208,45 |
